# Supplementary material for: Synthesis and characterization of guanidinate tin(ii) complexes for ring-opening polymerization of cyclic esters
Source: Royal Society of Chemistry journal article supplement (doi:10.1039/d0dt01115k), 2020-01-01
Supplement: d0dt01115k1.pdf [file d0dt01115k1.pdf]

*Electronic Supplementary Information for*

**Synthesis and characterizations of guanidinate tin(II) complexes for ring-opening polymerizations of cyclic esters**

**Thasanaporn Ungpittagul,<sup>a,b</sup> Phonpimon Wongmahasirikun,<sup>a</sup> and Khamphée Phomphrai<sup>\*a,c</sup>**

<sup>a</sup> Department of Materials Science and Engineering, School of Molecular Science and Engineering, Vidyasirimedhi Institute of Science and Technology, Wangchan, Rayong 21210, Thailand. \*E-mail: [khamphée.p@vistec.ac.th](mailto:khamphée.p@vistec.ac.th)

<sup>b</sup> Center for Catalysis, Department of Chemistry and Center of Excellence for Innovation in Chemistry, Faculty of Science, Mahidol University, Rama 6 Road, Bangkok 10400 Thailand

<sup>c</sup> Research Network of NANOTEC-VISTEC on Nanotechnology for Energy, Vidyasirimedhi Institute of Science and Technology, Wangchan, Rayong 21210 Thailand

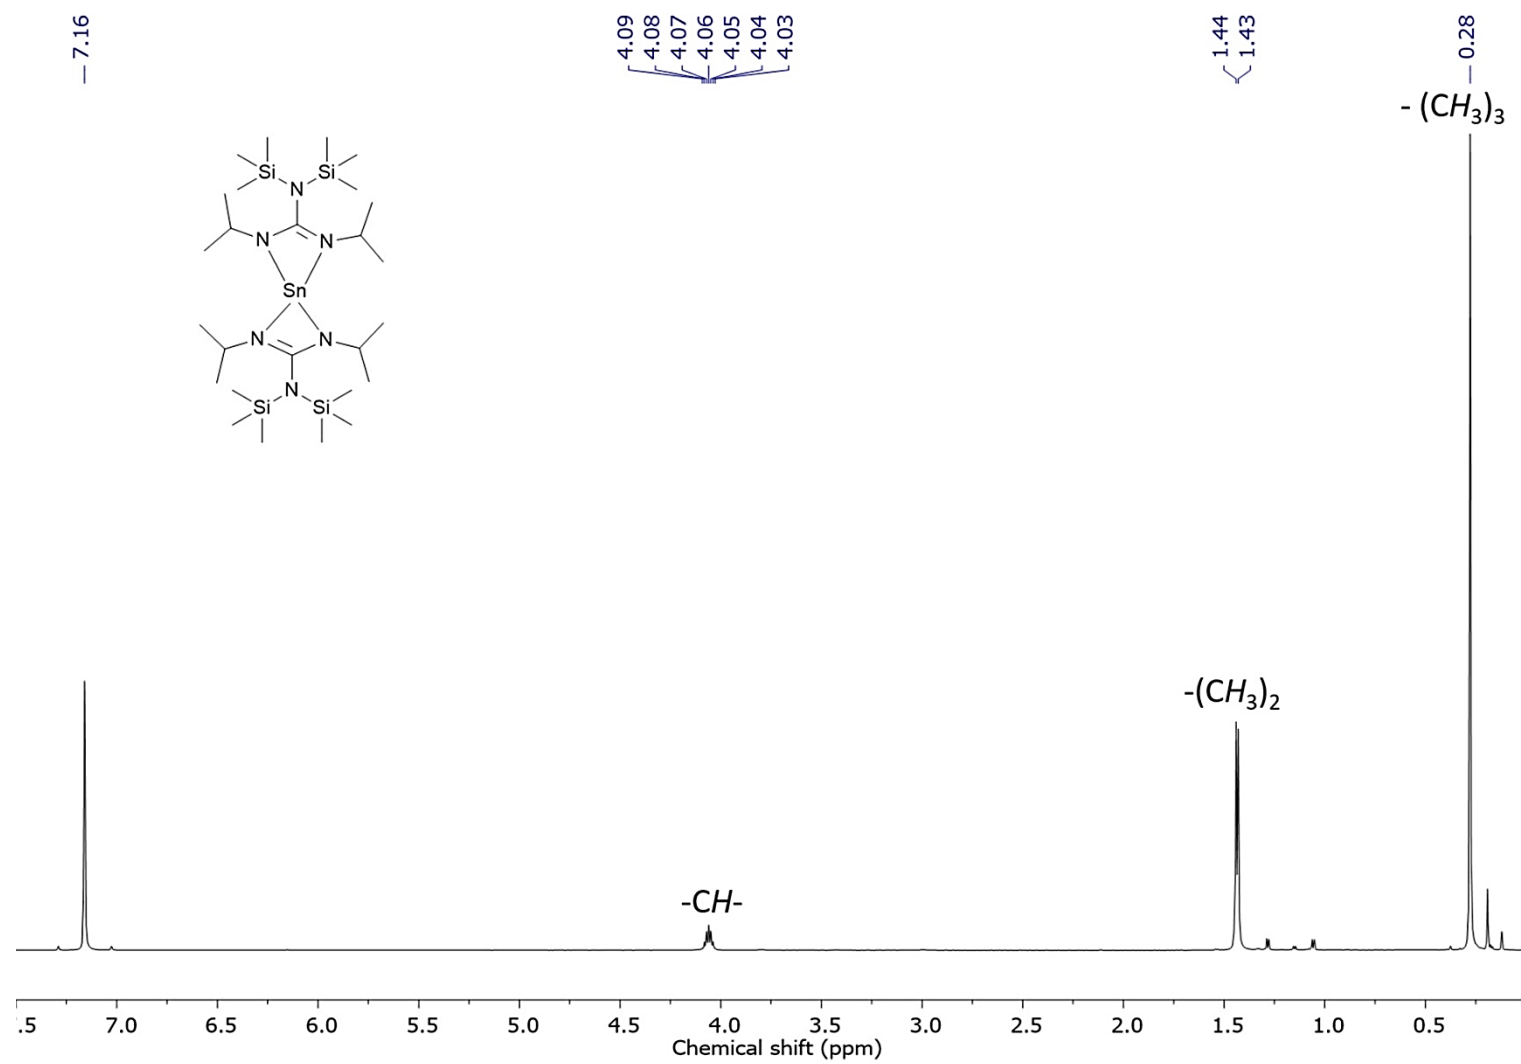

**Figure S1.**  $^1\text{H}$  NMR spectra of **1** (600 MHz,  $\text{CDCl}_3$ , 30  $^\circ\text{C}$ ).

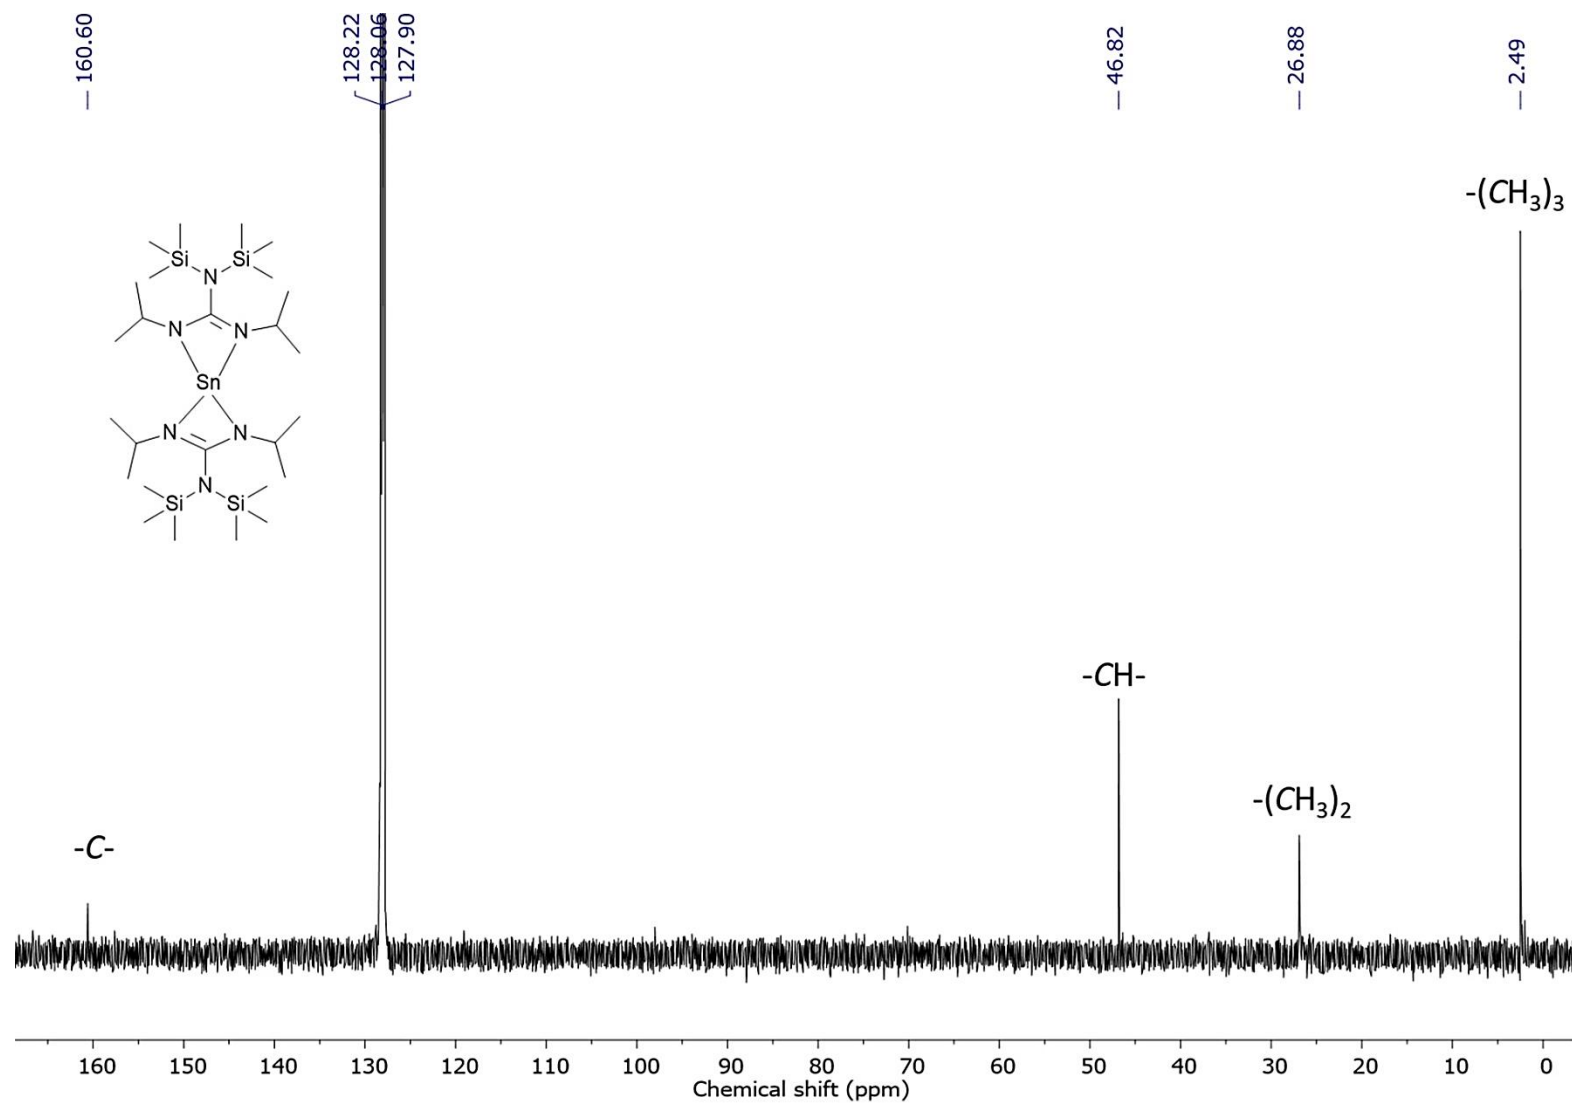

**Figure S2.**  $^{13}\text{C}\{^1\text{H}\}$  NMR spectra of **1** (150 MHz,  $\text{C}_6\text{D}_6$ , 30 °C).

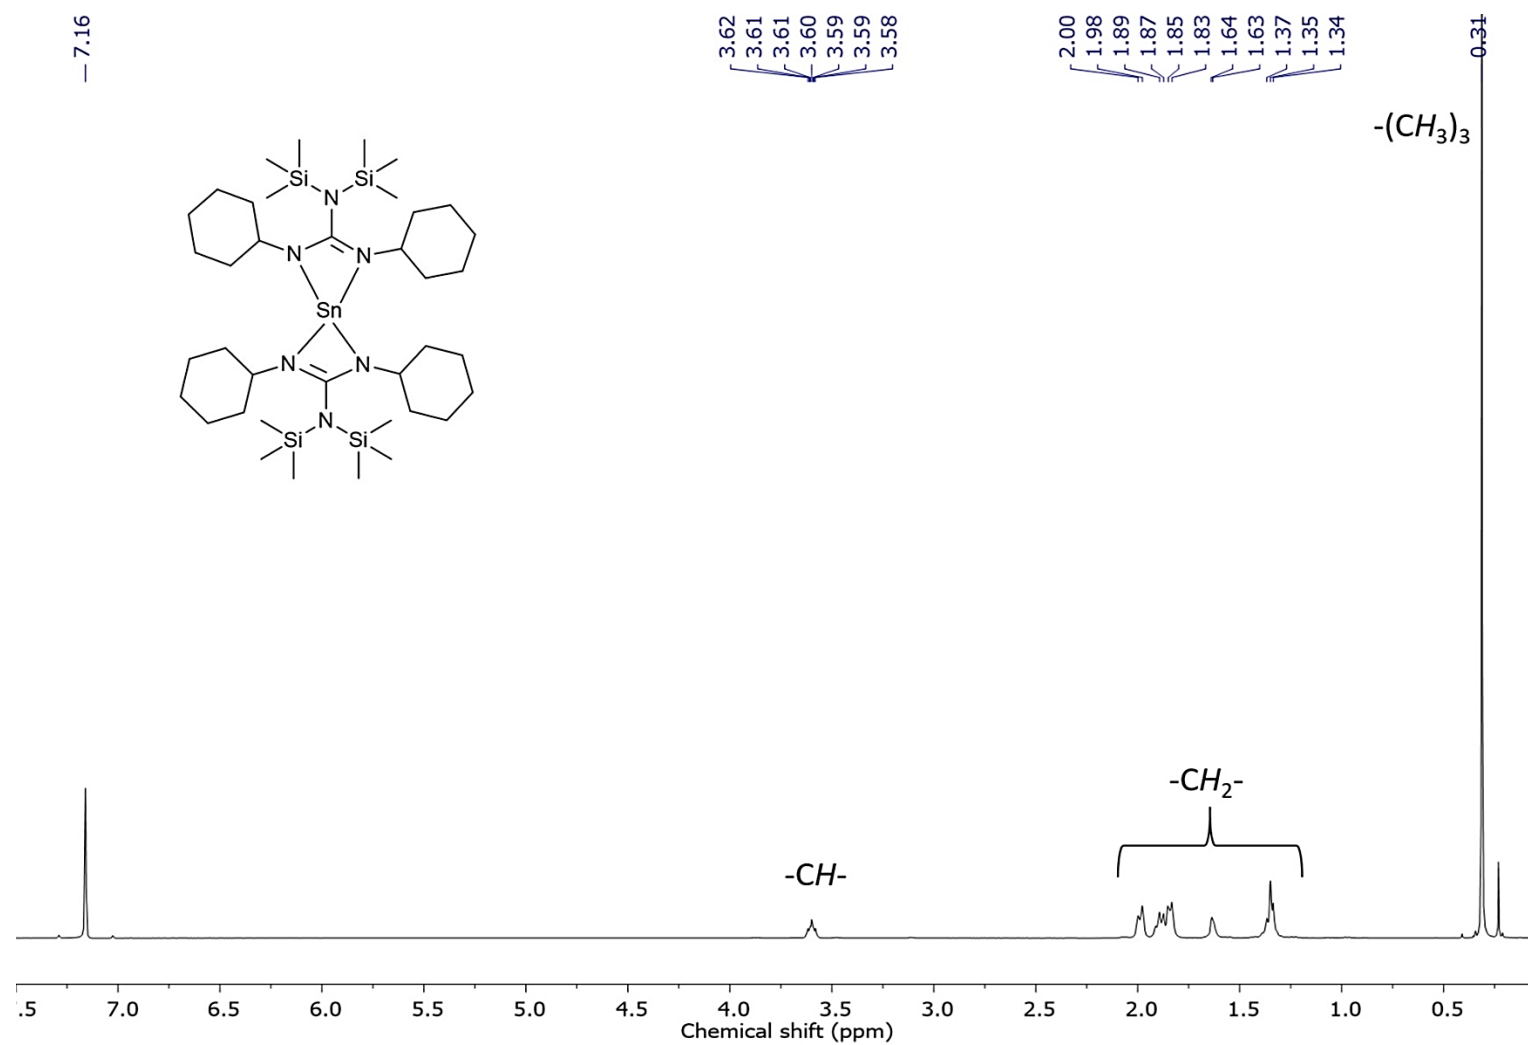

**Figure S3.** <sup>1</sup>H NMR spectra of **2** (600 MHz, C<sub>6</sub>D<sub>6</sub>, 30 °C).

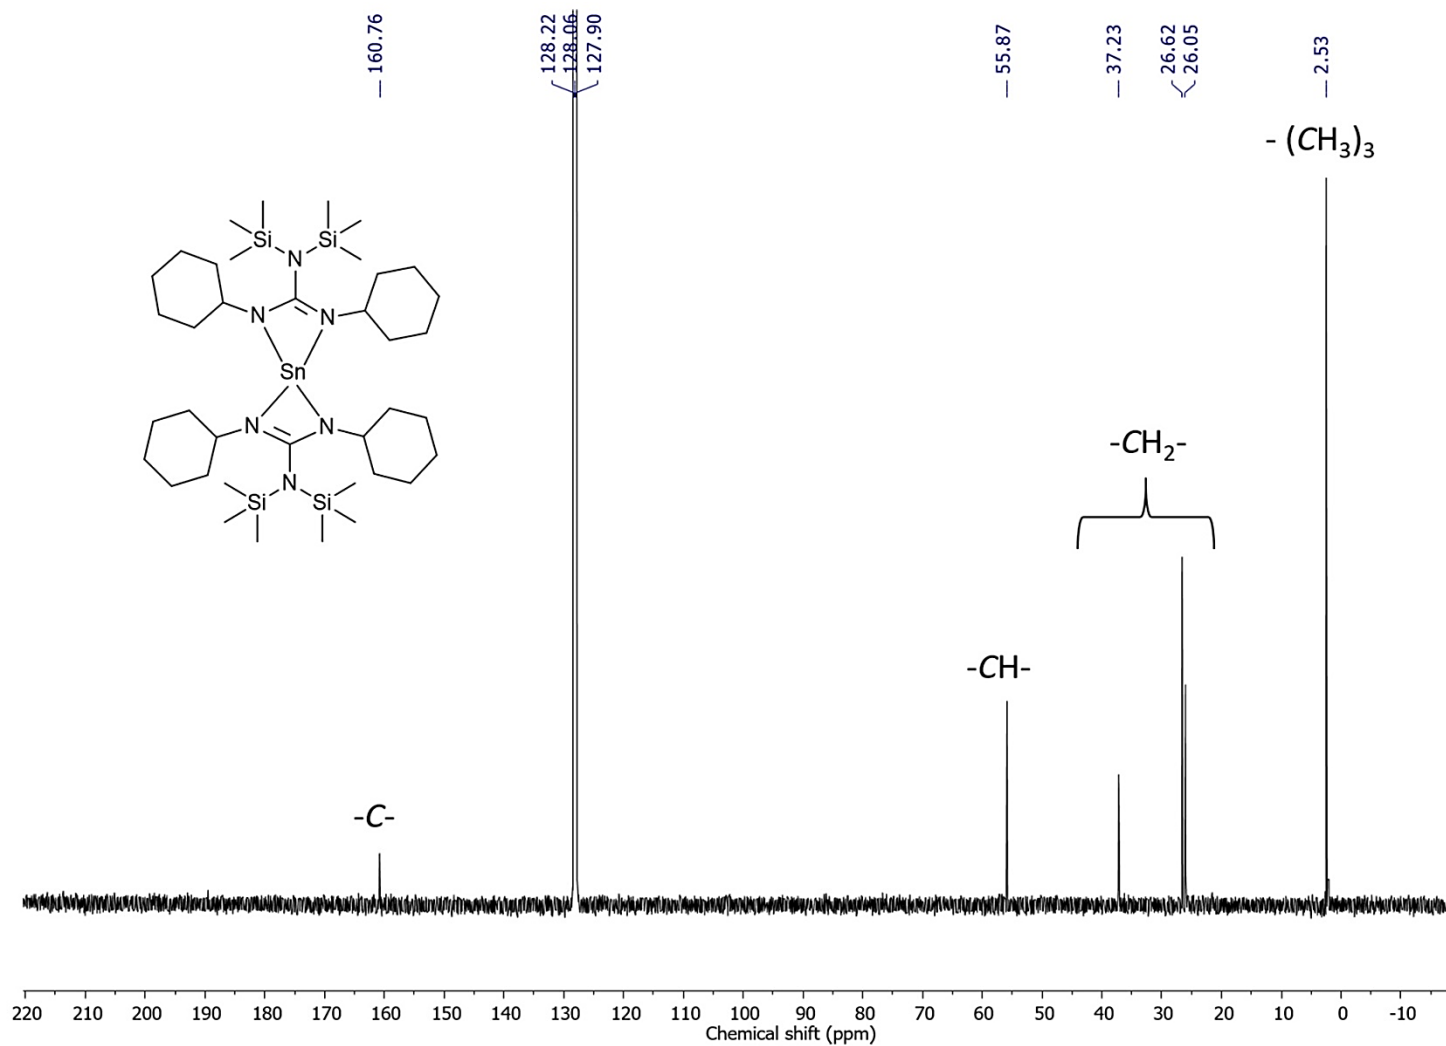

**Figure S4.**  $^{13}\text{C}\{^1\text{H}\}$  NMR spectra of **2** (150 MHz,  $\text{C}_6\text{D}_6$ , 30 °C).

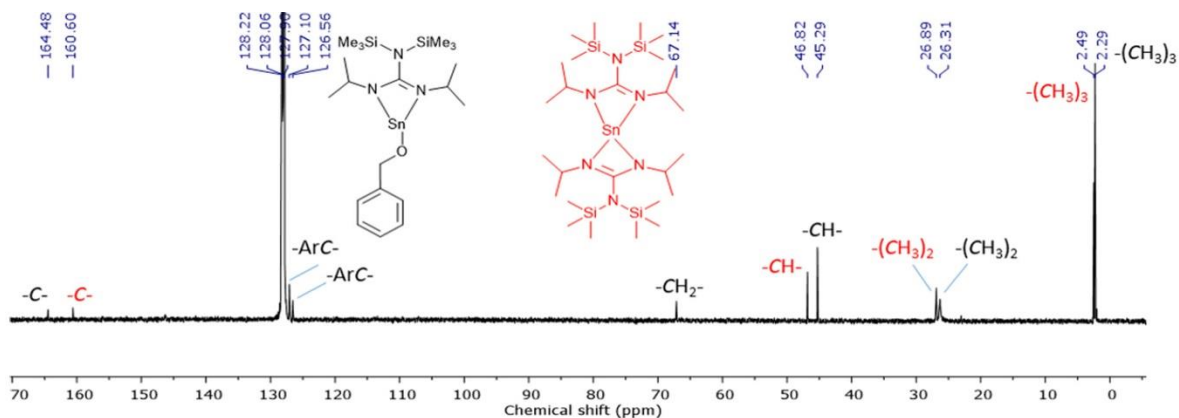

**Figure S5.**  $^{13}\text{C}\{^1\text{H}\}$  (150 MHz,  $\text{C}_6\text{D}_6$ , 30 °C) of **5** upon standing at room temperature for 3 h (600 MHz,  $\text{C}_6\text{D}_6$ , 30 °C).

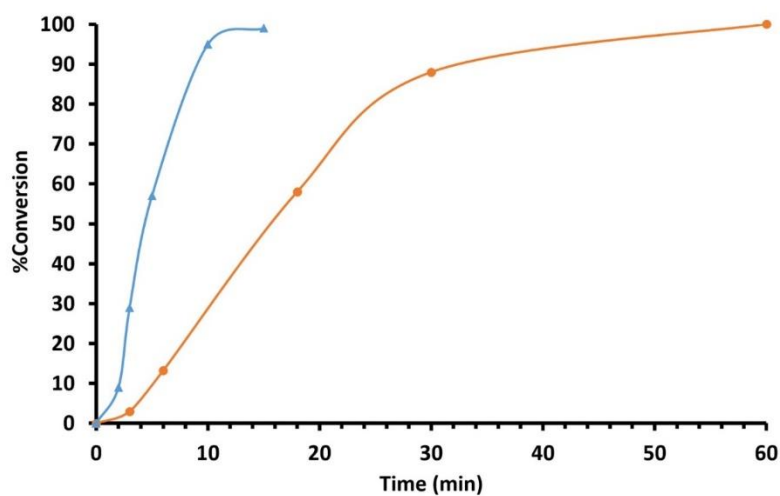

**Figure S6.** Neat polymerization at 120 °C.; ▲ = using  $\epsilon$ -CL: **1** molar ratio of 200: 1, ● = using  $\epsilon$ -CL: **2** molar ratio of 200: 1 (Table 2, entries 4-5).

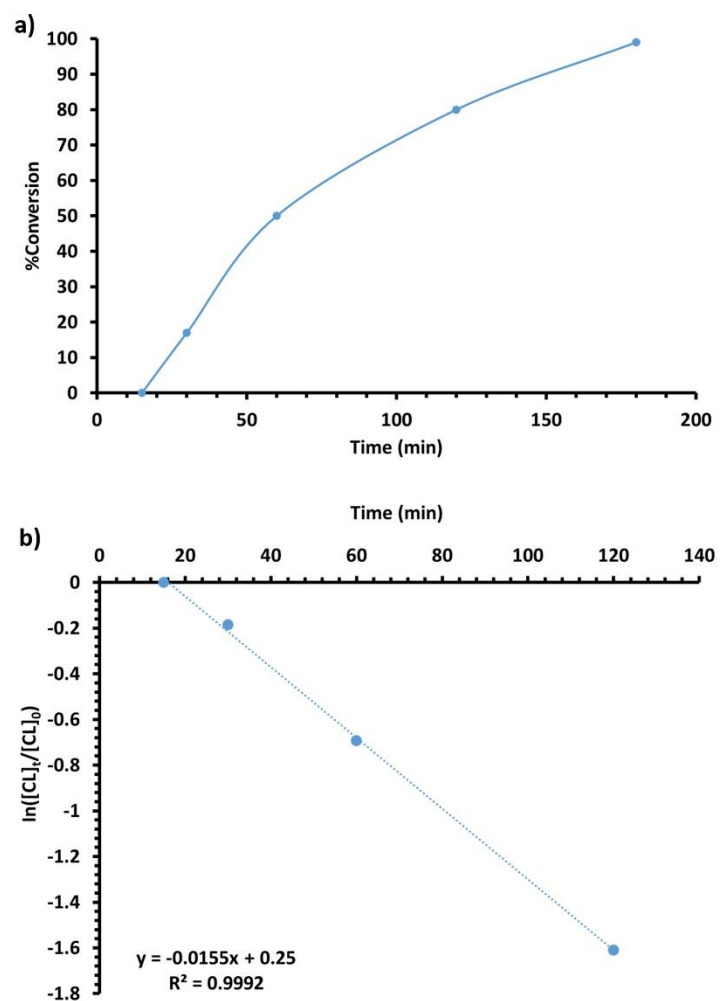

**Figure S7.** Solution polymerization using  $\epsilon$ -CL: **1** molar ratio of 100: 1 at 100 °C in toluene (Table 2, entry 8); a) plots of conversion vs. time, b) linear plots of  $\ln([\epsilon\text{-CL}]_t/[\epsilon\text{-CL}]_0)$  vs. time.

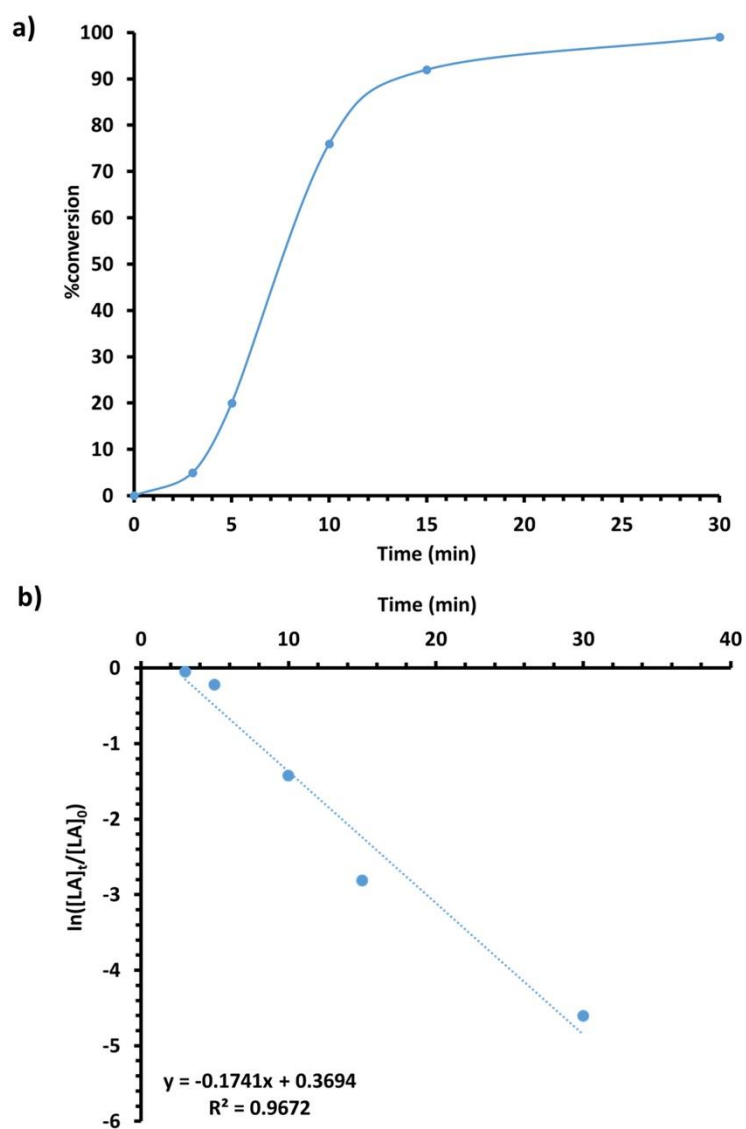

**Figure S8.** Solution polymerization using *L*-LA: **1** molar ratio of 100: 1 at 100 °C in toluene (Table 2, entry 11); a) plots of conversion vs. time, b) linear plots of  $\ln([LA]_t/[LA]_0)$  vs. time.

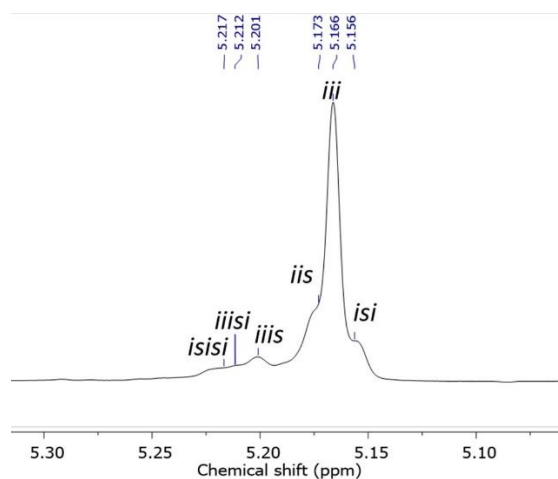

**Figure S9.** Homonuclear decoupled  $^1\text{H}$  NMR spectra of PLAs obtained from *L*-LA (600 MHz,  $\text{CDCl}_3$ , 30  $^\circ\text{C}$ ). NMR signals were assigned according to literature.<sup>1,2</sup>

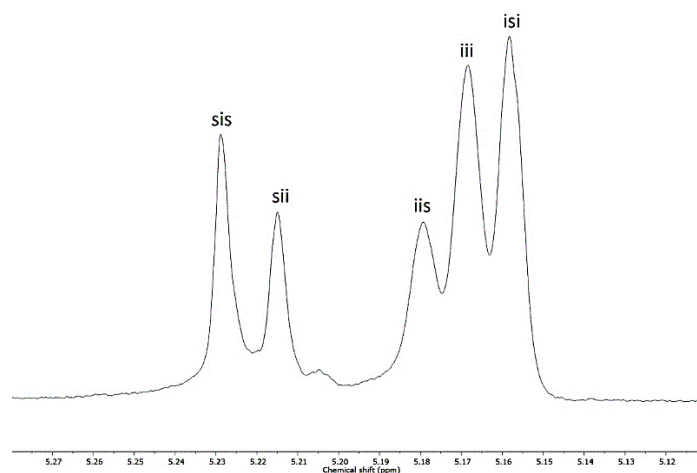

**Figure S10.** Homonuclear decoupled  $^1\text{H}$  NMR spectra of PLAs obtained from *rac*-LA (600 MHz,  $\text{CDCl}_3$ , 30  $^\circ\text{C}$ ). NMR signals were assigned according to literature.<sup>3</sup> The probability of racemic enchainment ( $P_r$ ) was calculated as shown below.

#### The determination of probability of racemic enchainment ( $P_r$ )

Generally, the atactic PLA shows five tetrads in its homonuclear decoupled  $^1\text{H}$  NMR spectra including  $[sis]$ ,  $[sii]$ ,  $[iis]$ ,  $[iii]$ , and  $[isi]$ . According to tetrad probabilities based on Bernoullian statistics<sup>4</sup>, The  $P_r$  value can be calculated using following equation;

$$[sis] = P_r^2/2 \quad (1)$$

$$2[sis] = P_r^2 \quad (2)$$

$$P_r = \sqrt{2[sis]} \quad (3)$$

$$P_m = 1 - P_r \quad (4)$$

Where  $P_m$  equals the probability of *meso* enchainment.

$[sis]$  value equals the integrated intensity ratio of *sis* tetrads divided by that of total methine proton region. For heterotactic PLAs, the  $P_r$  value is close to 1, on the other hand the  $P_r$  value of isotactic PLAs is close to 0. For atactic PLAs, the  $P_r$  value is 0.5.

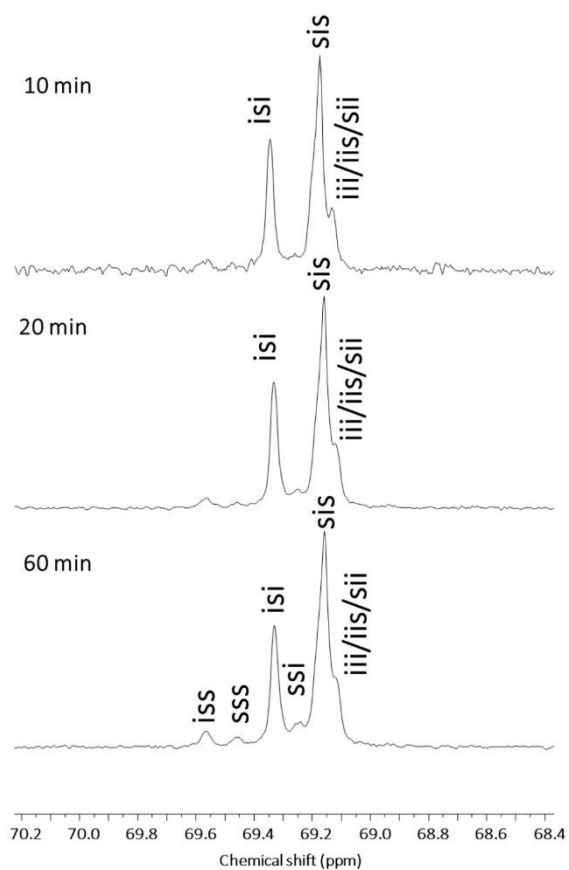

**Figure S11.**  $^{13}\text{C}\{^1\text{H}\}$  spectra (150 MHz,  $\text{CDCl}_3$ , 30 °C) of PLA obtained from the polymerization of *rac*-LA at 10 min (43 % conv.), 20 min (80% conv.), and 60 min (95% conv.).

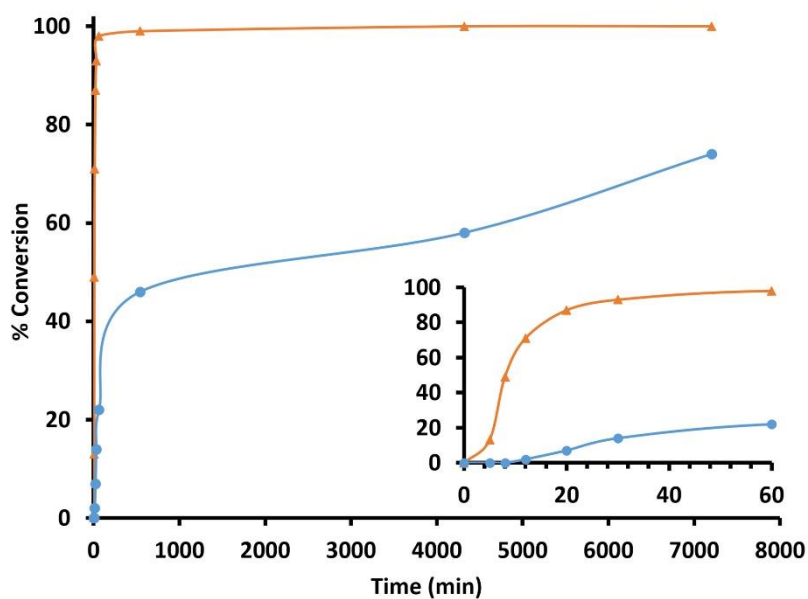

**Figure S12.** Solution copolymerization of *L*-LA and  $\epsilon$ -CL using *L*-LA:  $\epsilon$ -CL: 1 molar ratio of 100: 100: 1 at 100 °C (Table 2, entry 13);  $\blacktriangle$  = PLA,  $\bullet$  = PCL.

### Determination of average sequence length

For a quantitative analysis according to Bernoulli statistics,  $^{13}\text{C}\{^1\text{H}\}$  NMR spectroscopy was used to analyse the copolymer chains by the integrated intensity ratio of resonance signals. Here in, the transesterification reaction was observed in polymerization using **1** and **Sn(Oct)<sub>2</sub>** as a catalyst. This phenomenon leads to generate CLC signal which are the second mode of transesterification implying the chains were cut during copolymerization. The experimental-average lengths of lactidyl blocks  $I_{\text{LL}}$  and  $I_{\text{C}}$  can be calculated by the following equation.<sup>5–8</sup>

$$I_{\text{LL}} = \frac{1}{2} (\text{LLL} + \text{LLC} + \text{CLL} + \text{CLC}) / (\text{CLC} + \frac{1}{2} (\text{LLC} + \text{CLL})) \quad (1)$$

$$\text{LLL} = \frac{1}{2} [\text{CLLLL}] + \frac{1}{2} [\text{LLLLC}] + \frac{1}{3} [\text{CLLLC}] + [\text{LLLLLL}] \quad (2)$$

$$\text{LLC} = \frac{1}{2} [\text{CLLC}] + \frac{1}{2} [\text{LLLLC}] + \frac{1}{3} [\text{CLLLC}] \quad (3)$$

$$\text{CLL} = \frac{1}{2} [\text{CLLC}] + \frac{1}{2} [\text{CLLLL}] + \frac{1}{3} [\text{CLLLC}] \quad (4)$$

$$\text{CLC} = [\text{CLC}] \quad (5)$$

$$I_{\text{C}} = (\text{LCL} + \text{CCL} + \text{LCC} + \text{CCC}) / (\text{LCL} + \frac{1}{2} (\text{CCL} + \text{LCC})) \quad (6)$$

$$\text{LCL} = [\text{LLCLL}] + [\text{LLCLC}] + [\text{CLCLL}] + [\text{CLCLC}] \quad (7)$$

$$\text{CCL} = [\text{CCLC}] + [\text{CCLL}] \quad (8)$$

$$\text{LCC} = [\text{CLCC}] + [\text{LLCC}] \quad (9)$$

$$\text{CCC} = [\text{CCC}] \quad (10)$$

### References

- 1 E. J. Shin, A. E. Jones and R. M. Waymouth, *Macromolecules*, 2012, **45**, 595–598.
- 2 K. A. M. Thakur, R. T. Kean, E. S. Hall, J. J. Kolstad, T. A. Lindgren, M. A. Doscotch, J. I. Siepmann and E. J. Munson, *Macromolecules*, 1997, **30**, 2422–2428.
- 3 N. Nimitsirawat, V. C. Gibson, E. L. Marshall, A. J. P. White, S. H. Dale and M. R. J. Elsegood, *Dalton Trans.*, 2007, 4464–4471.
- 4 B. M. Chamberlain, M. Cheng, D. R. Moore, T. M. Ovitt, E. B. Lobkovsky and G. W. Coates, *J. Am. Chem. Soc.*, 2001, **123**, 3229–3238.
- 5 J. Kasperczyk and M. Bero, *Die Makromol. Chemie*, 1991, **192**, 1777–1787.
- 6 M. Bero, J. Kasperczyk and G. Adamus, *Die Makromol. Chemie*, 1993, **194**, 907–912.
- 7 M. Bero and J. Kasperczyk, *Macromol. Chem. Phys.*, 1996, **197**, 3251–3258.
- 8 J. Kasperczyk and M. Bero, *Die Makromol. Chemie*, 1993, **194**, 913–925.
